# Supplementary material
Source: Springer Nature journal article supplement (https://www.springermedizin.de/resource/supplementary/13045_2008_19_MOESM2_ESM.pdf/9660482)

**A****Total Nucleated Cells  
Absolute Expansion Fold**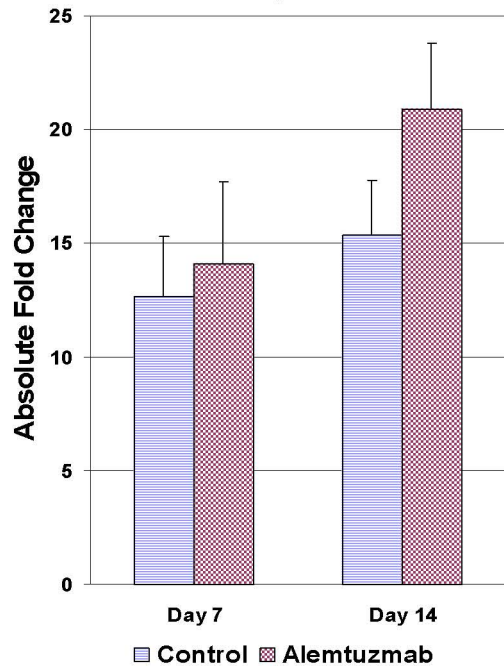**B****Absolute CD34+ cell count**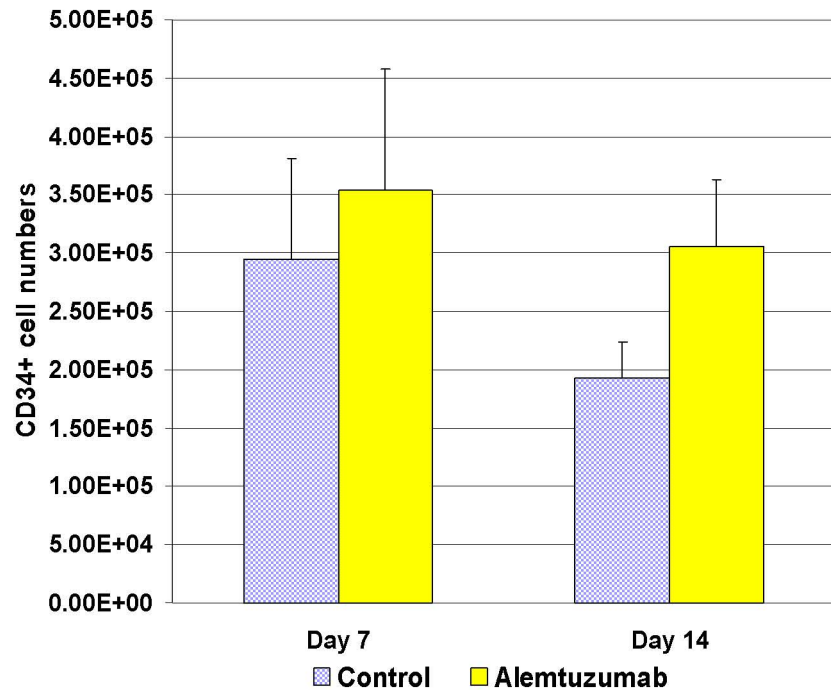

Supplement: MOESM2 [file 9660482]
